# Supplementary material
Source: MDPI journal article supplement (https://www.mdpi.com/2073-4395/12/10/2473)

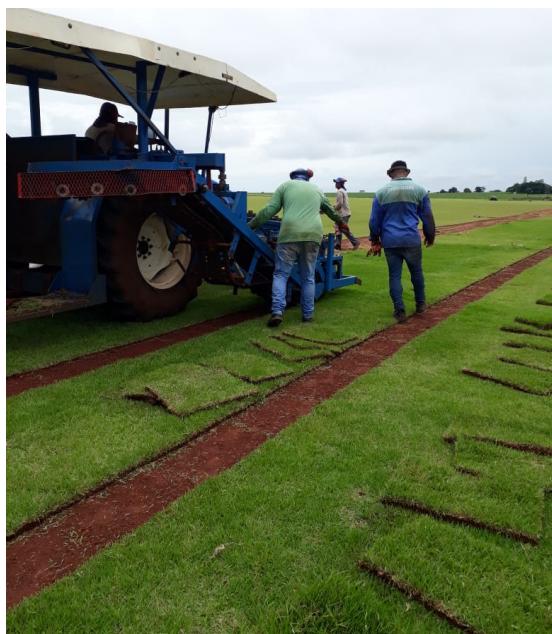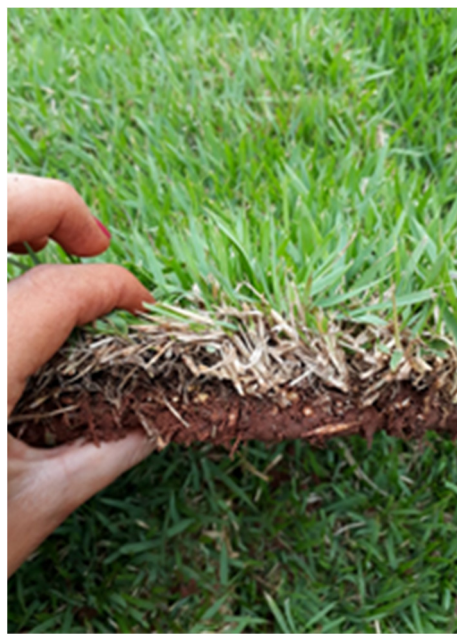

**Supplementary Figure S1.** Harvest of sod carpets of emerald grass (*Zoysia japonica* Steud.).

Supplement: s1 [file s1]
